# Supplementary material for: Analysis of bimodal thermally-induced denaturation of type I collagen extracted from calfskin
Source: Royal Society of Chemistry journal article supplement (doi:10.1039/c5ra02708j), 2015-01-01
Supplement: c5ra02708j1.pdf [file c5ra02708j1.pdf]

## Electronic Supplementary Information

### Analysis of bimodal thermally-induced denaturation of type I collagen extracted from calfskin

T. Staicu<sup>1</sup>, V. Cîrcu<sup>2</sup>, G. Ioniță<sup>3</sup>, C. Ghica<sup>4</sup>, V.T. Popa<sup>3\*</sup>, M. Micutz<sup>1,3\*</sup>

<sup>1</sup>Department of Physical Chemistry, University of Bucharest, 4-12 Regina Elisabeta Blvd., Bucharest 030018, Romania, e-mail: micutz@gw-chimie.math.unibuc.ro

<sup>2</sup>Department of Inorganic Chemistry, University of Bucharest, 23 Dumbrava Rosie St., Bucharest 020464, Romania

<sup>3</sup>Institute of Physical Chemistry "Ilie Murgulescu", Romanian Academy, Spl. Independenței 202, Bucharest 060021, Romania

<sup>4</sup>National Institute of Materials Physics, 105 Atomistilor St., Măgurele-Bucharest 077125, Romania

#### Content:

|                                                                                                                                                                                                                                                                                                                                   |    |
|-----------------------------------------------------------------------------------------------------------------------------------------------------------------------------------------------------------------------------------------------------------------------------------------------------------------------------------|----|
| 1. Table S1. Peak temperatures, relative peak areas and enthalpy changes of the endothermic denaturation process experienced by CI in acidic solutions.....                                                                                                                                                                       | 2  |
| 2. Table S2. Hypothetical polydispersity of CI aggregates in acidic solutions. A Gaussian distribution was considered with $M_0 = 360$ kDa and $\sigma^2 = 300$ .....                                                                                                                                                             | 3  |
| 3. Table S3. Theoretical compositions of a CI solution containing collagen in monomeric, dimeric and trimeric form ( $\bar{M}_v = 359$ kDa).....                                                                                                                                                                                  | 4  |
| 5. Figure S1. Gaussian distribution profile (centered at 360 kDa) of hypothetical CI aggregates in acidic solution. The area under the distribution curve and delimited by two successive vertical grids is numerically equal to the weight fraction ( $w_i$ ) of the CI aggregates with molecular mass $M_i$ (see Table S2)..... | 5  |
| 6. Figure S2. Histogram of polydispersity based on the Gaussian distribution plotted in Figure S1 and weight fractions shown in Table S2.....                                                                                                                                                                                     | 5  |
| 7. Figure S3. Viscosity vs. inverse absolute temperature as semilogarithmic plot for aqueous solution of $10^{-2}$ M HCl.....                                                                                                                                                                                                     | 6  |
| 8. Figure S4. Suitable viscosity-temperature plots for determining (a) denaturation temperature and (b) activation energy of viscous flow for acidic solution of 0.100% CI.....                                                                                                                                                   | 7  |
| 9. Figure S5. Suitable viscosity-temperature plots for determining (a) denaturation temperature and (b) activation energy of viscous flow for acidic solution of 0.220% CI.....                                                                                                                                                   | 8  |
| 10. Figure S6. Suitable viscosity-temperature plots for determining (a) denaturation temperature and (b) activation energy of viscous flow for acidic solution of 0.290% CI.....                                                                                                                                                  | 9  |
| 11. Normal distribution of polydispersity profile with respect to the CI aggregates masses in solution.....                                                                                                                                                                                                                       | 10 |

Table S1. Peak temperatures, relative peak areas and enthalpy changes of the endothermic denaturation process experienced by CI in acidic solutions

| Concentration, % (w/w) | Heating rate, Kmin <sup>-1</sup> | Peak 1                                                                            | Peak 2                                                                                                  | Determination coefficient (R <sup>2</sup> ) | $\Delta H,^*$ kJmol <sup>-1</sup> |
|------------------------|----------------------------------|-----------------------------------------------------------------------------------|---------------------------------------------------------------------------------------------------------|---------------------------------------------|-----------------------------------|
|                        |                                  | Peak temperature (T <sub>1</sub> , T <sub>2</sub> ), °C/<br>relative peak area, % |                                                                                                         |                                             |                                   |
| <b>0.075</b>           | 0.1                              | 31.06/19.8                                                                        | 35.43/80.2                                                                                              | 0.98953                                     | 9.87                              |
|                        | 0.2                              | 31.86/21.9                                                                        | 36.23/78.1                                                                                              | 0.99580                                     | 10.00                             |
|                        | 0.3                              | 32.46/20.1                                                                        | 36.93/79.9                                                                                              | 0.99670                                     | 9.87                              |
|                        | 0.4                              | 33.08/16.9                                                                        | 37.59/83.1                                                                                              | 0.99683                                     | 9.73                              |
|                        | 0.5                              | 33.59/18.9                                                                        | 38.05/81.1                                                                                              | 0.99824                                     | 10.00                             |
|                        |                                  |                                                                                   | Equilibrium peak temperature (T <sub>1eq</sub> , T <sub>2eq</sub> ), °C/<br>correlation coefficient (R) |                                             |                                   |
|                        |                                  | 30.53±0.10/<br>0.99119                                                            | 34.87±0.12/<br>0.99559                                                                                  |                                             | 9.89±0.11                         |
| <b>0.100</b>           |                                  | (T <sub>1</sub> , T <sub>2</sub> ), °C/<br>relative peak area, %                  |                                                                                                         | R <sup>2</sup>                              | $\Delta H, \text{kJmol}^{-1}$     |
|                        | 0.1                              | 31.13/19.1                                                                        | 35.45/80.9                                                                                              | 0.99340                                     | 6.70                              |
|                        | 0.2                              | 31.82/21.1                                                                        | 36.27/78.9                                                                                              | 0.99424                                     | 7.22                              |
|                        | 0.3                              | 31.98/22.6                                                                        | 36.89/77.4                                                                                              | 0.98978                                     | 7.90                              |
|                        | 0.4                              | 32.90/22.6                                                                        | 37.52/77.4                                                                                              | 0.99016                                     | 9.00                              |
|                        | 0.5                              | 33.55/20.4                                                                        | 38.11/79.6                                                                                              | 0.99272                                     | 9.30                              |
|                        |                                  |                                                                                   | (T <sub>1eq</sub> , T <sub>2eq</sub> ), °C/R                                                            |                                             |                                   |
|                        |                                  | 30.51±0.21/<br>0.98287                                                            | 34.88±0.10/<br>0.99792                                                                                  |                                             | 8.02±1.12                         |
| <b>0.220</b>           |                                  | (T <sub>1</sub> , T <sub>2</sub> ), °C/<br>relative peak area, %                  |                                                                                                         | R <sup>2</sup>                              | $\Delta H, \text{kJmol}^{-1}$     |
|                        | 0.1                              | 31.39/19.2                                                                        | 35.36/80.8                                                                                              | 0.99632                                     | 5.14                              |
|                        | 0.2                              | 32.14/16.1                                                                        | 36.22/83.9                                                                                              | 0.99860                                     | 5.18                              |
|                        | 0.3                              | 32.63/17.0                                                                        | 36.87/83.0                                                                                              | 0.99853                                     | 5.14                              |
|                        | 0.4                              | 33.22/16.9                                                                        | 37.45/83.1                                                                                              | 0.99872                                     | 5.00                              |
|                        | 0.5                              | 33.30/8.7                                                                         | 37.99/91.3                                                                                              | 0.99734                                     | 5.00                              |
|                        |                                  |                                                                                   | (T <sub>1eq</sub> , T <sub>2eq</sub> ), °C/R                                                            |                                             |                                   |
|                        |                                  | 31.07±0.20/<br>0.97407                                                            | 34.83±0.12/<br>0.99539                                                                                  | 80.2±11.2                                   | 5.09±0.09                         |
| <b>0.290</b>           |                                  | (T <sub>1</sub> , T <sub>2</sub> ), °C/<br>relative peak area, %                  |                                                                                                         | R <sup>2</sup>                              | $\Delta H, \text{kJmol}^{-1}$     |
|                        | 0.1                              | 31.12/17.3                                                                        | 35.47/82.7                                                                                              | 0.99883                                     | 7.41                              |
|                        | 0.2                              | 32.08/18.5                                                                        | 36.25/81.5                                                                                              | 0.99786                                     | 7.24                              |
|                        | 0.3                              | 32.69/17.2                                                                        | 36.98/82.8                                                                                              | 0.99804                                     | 7.31                              |
|                        | 0.4                              | 32.96/19.0                                                                        | 37.42/81.0                                                                                              | 0.99849                                     | 7.55                              |
|                        | 0.5                              | 33.48/18.3                                                                        | 37.95/81.7                                                                                              | 0.99928                                     | 7.24                              |
|                        |                                  |                                                                                   | (T <sub>1eq</sub> , T <sub>2eq</sub> ), °C/R                                                            |                                             |                                   |
|                        |                                  | 30.79±0.23/<br>0.97734                                                            | 34.98±0.14/<br>0.99315                                                                                  | 50.9±0.9                                    | 7.35±0.13                         |
|                        |                                  | Average relative peak area, %                                                     |                                                                                                         |                                             |                                   |
|                        |                                  | 18.6±3.0                                                                          | 81.4±3.0                                                                                                |                                             |                                   |

\*All enthalpies are considered in kJ per mole of amino acid residue whose mean molar mass was taken as 100 g mol<sup>-1</sup>

Table S2. Hypothetical polydispersity of CI aggregates in acidic solutions. A Gaussian distribution was considered with  $M_0 = 360$  kDa and  $\sigma^2 = 300$

| weight fractions, $w_i$ | molecular masses of aggregates, $M_i$ (kDa) | $\bar{M}_w^*$ (kDa) | $\bar{M}_v$ (kDa) |
|-------------------------|---------------------------------------------|---------------------|-------------------|
| 0.00066                 | 300                                         | 360                 | 360.3≈360         |
| 0.00397                 | 310                                         |                     |                   |
| 0.01712                 | 320                                         |                     |                   |
| 0.05222                 | 330                                         |                     |                   |
| 0.11871                 | 340                                         |                     |                   |
| 0.19342                 | 350                                         |                     |                   |
| <b>0.22760</b>          | <b>360</b>                                  |                     |                   |
| 0.19342                 | 370                                         |                     |                   |
| 0.11871                 | 380                                         |                     |                   |
| 0.05222                 | 390                                         |                     |                   |
| 0.01712                 | 400                                         |                     |                   |
| 0.00397                 | 410                                         |                     |                   |
| 0.00066                 | 420                                         |                     |                   |

\*  $\bar{M}_w = \sum_i w_i M_i$

Table S3. Theoretical compositions of a CI solution containing collagen in monomeric, dimeric and trimeric form ( $\bar{M}_v = 359$  kDa)

| <b>weight fraction of collagen, %</b> |                              |                               |
|---------------------------------------|------------------------------|-------------------------------|
| <b>w<sub>1</sub> (monomer)</b>        | <b>w<sub>2</sub> (dimer)</b> | <b>w<sub>3</sub> (trimer)</b> |
| 85.00                                 | 14.76                        | 0.24                          |
| 86.00                                 | 13.09                        | 0.91                          |
| 87.00                                 | 11.43                        | 1.57                          |
| 88.00                                 | 9.77                         | 2.33                          |
| 89.00                                 | 8.10                         | 2.90                          |
| 90.00                                 | 6.44                         | 3.56                          |
| 91.00                                 | 4.78                         | 4.22                          |
| 92.00                                 | 3.11                         | 4.89                          |
| 93.00                                 | 1.45                         | 5.55                          |
| 93.80                                 | 0.12                         | 6.08                          |

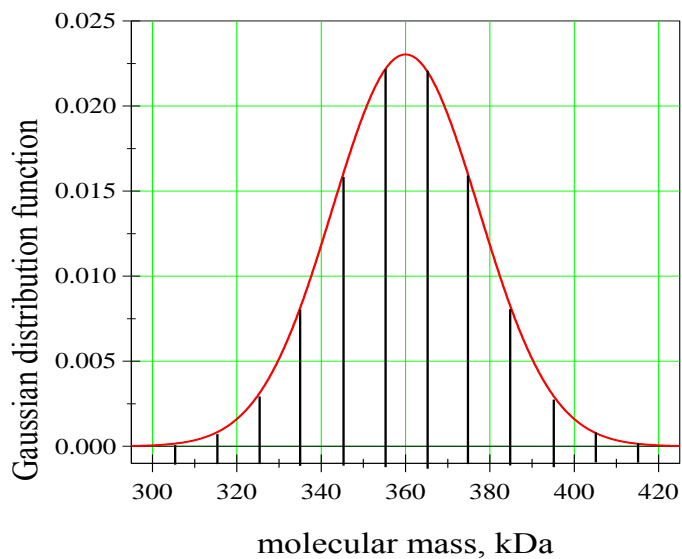

Figure S1. Gaussian distribution profile (centered at 360 kDa) of hypothetical CI aggregates in acidic solution. The area under the distribution curve and delimited by two successive vertical grids is numerically equal to the weight fraction ( $w_i$ ) of the CI aggregates with molecular mass  $M_i$  (see Table S2)

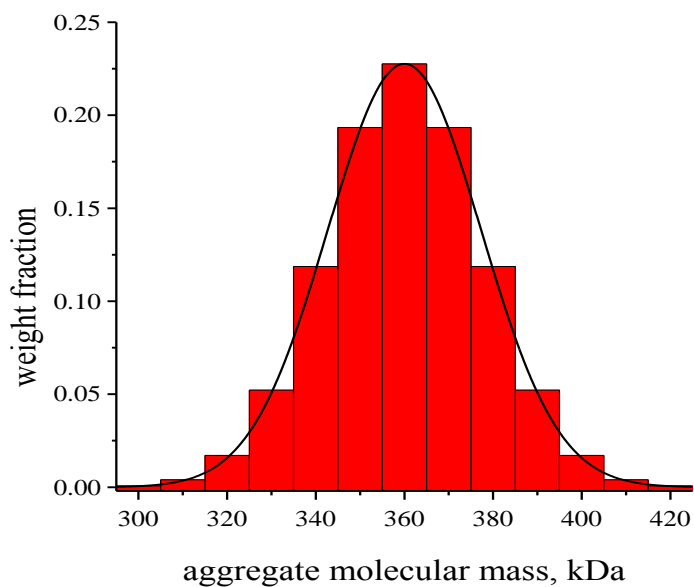

Figure S2. Histogram of polidispersity based on the Gaussian distribution plotted in Figure S1 and weight fractions shown in Table S2

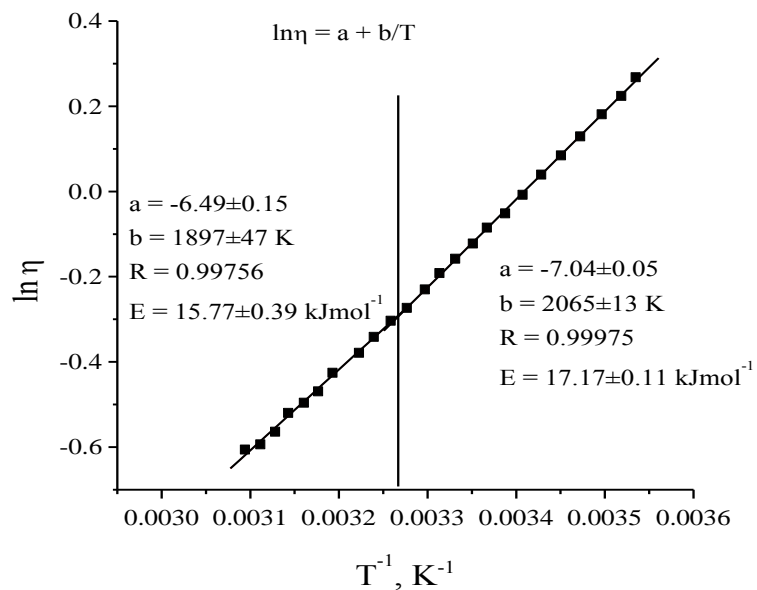

Figure S3. Viscosity vs. inverse absolute temperature as semilogarithmic plot for aqueous solution of  $10^{-2} \text{M HCl}$

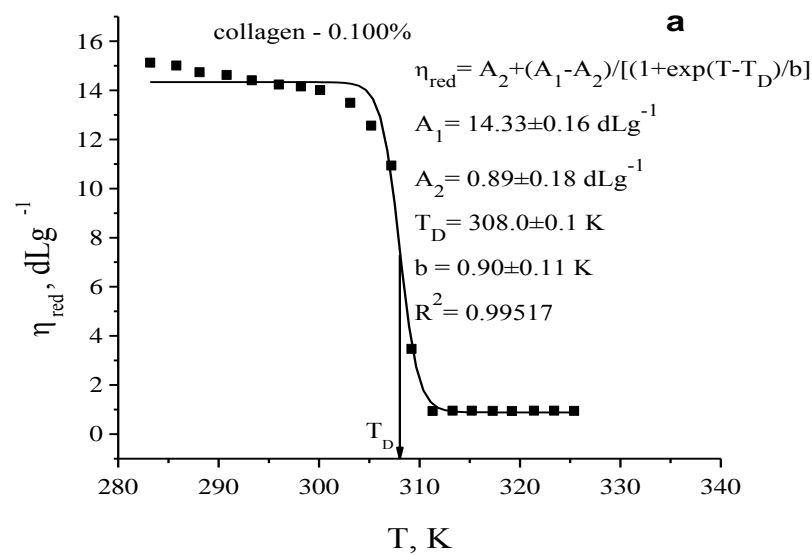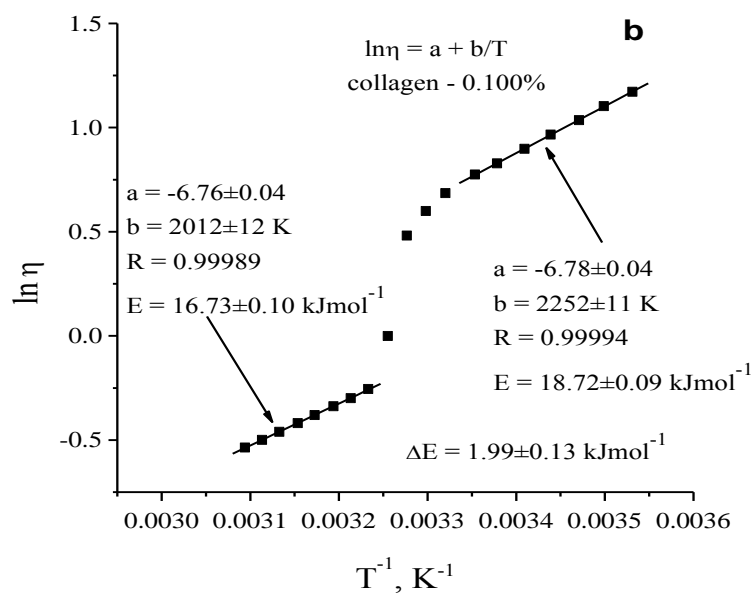

Figure S4. Suitable viscosity-temperature plots for determining (a) denaturation temperature and (b) activation energy of viscous flow for acidic solution of 0.100% CI

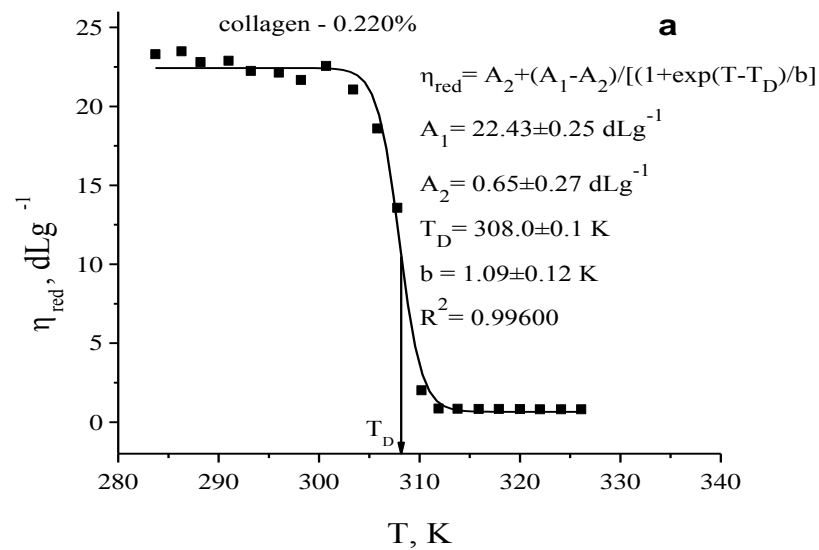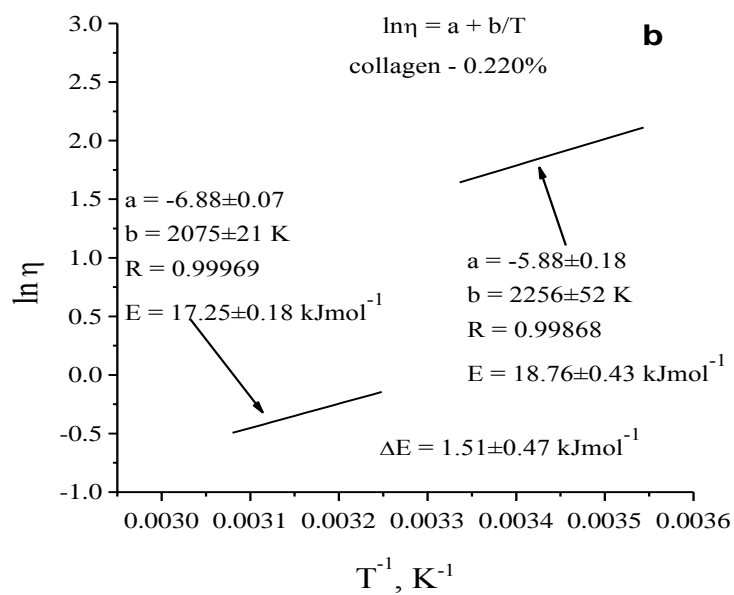

Figure S5. Suitable viscosity-temperature plots for determining (a) denaturation temperature and (b) activation energy of viscous flow for acidic solution of 0.220% CI



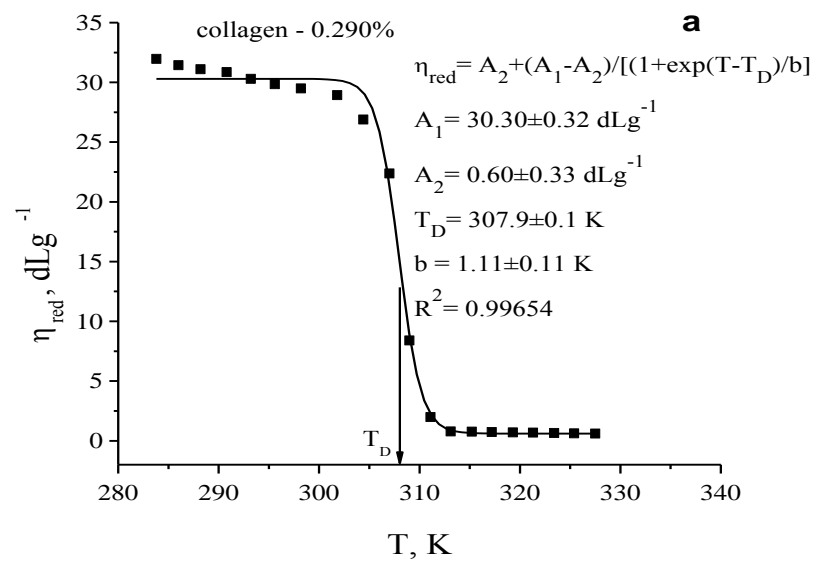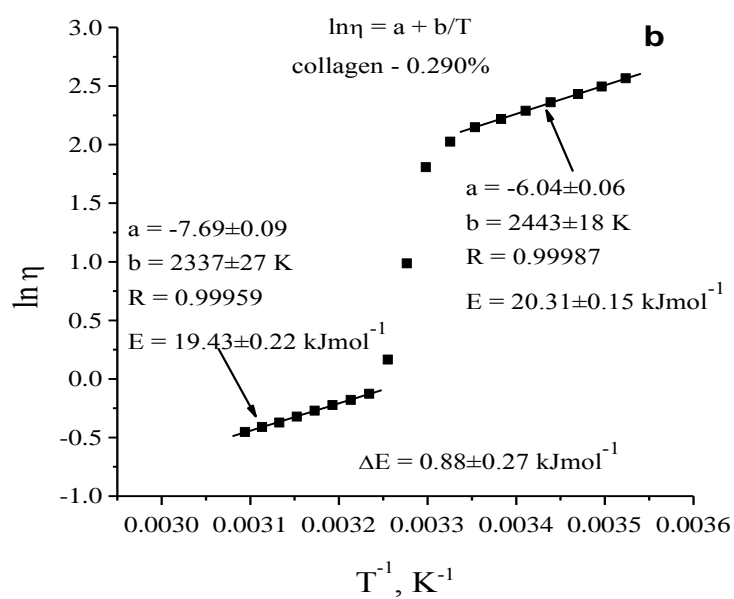

Figure S6. Suitable viscosity-temperature plots for determining (a) denaturation temperature and (b) activation energy of viscous flow for acidic solution of 0.290% CI

### Normal distribution of polydispersity profile with respect to the CI aggregates masses in solution

Let the polydispersity profile be a normal distribution (Gaussian distribution) given as:

$$f(M) = \frac{1}{\sqrt{2\pi\sigma^2}} e^{-\frac{(M-M_0)^2}{2\sigma^2}} \quad (1)$$

where  $M$  is molecular mass of CI aggregates,  $M_0$  – population's central and  $\sigma^2$  – population's variance. This means that the number of individual CI molecules that assemble to lead to a certain molecular mass  $M$  obeys a normal distribution. Practically, for such a distribution centered in  $M_0$  and depending on the system's variance, there is a finite domain delimited by a minimum ( $M_{\min}$ ) and a maximum mass ( $M_{\max}$ ), respectively, over which the distribution should be normalized to unity. In the studied cases of CI solutions,  $M_{\min}$  should be the molecular mass of CI in monomeric form ( $3 \times 10^5$  Da) and  $M_{\max}$  – the molecular mass of CI aggregates with a value symmetrically placed about  $M_0$ . At the same time, the quantity  $f(M)dM$  defines the weight of CI molecules that are assembled in aggregates with molecular masses ranging from  $M$  to  $M+dM$ , all with respect to the total weight of the collagen in the sample. In fact, this quantity is numerically equal to the weight fraction of the CI aggregates with the range of molecular masses just mentioned. Particularly, considering a central of distribution of 360 kDa with a total range of 295-425 kDa and a variance of 300 (Fig. S1), a discrete profile of CI polydispersity after an appropriate splitting of the distribution range into even intervals and choosing their midpoints as relevant molecular masses is shown in Table S2. Based on the significance of the weight average molecular mass ( $\bar{M}_w$ ) [1], it is obvious that the distribution's central of 360 kDa is exactly  $\bar{M}_w$  of the system. At the same time, according to the expression of the viscosity average molecular mass [1]

$$\bar{M}_v = \left( \frac{\sum_i N_i M_i^{a+1}}{\sum_i N_i M_i} \right)^{1/a} = \left( \sum_i w_i M_i^a \right)^{1/a} \quad (2)$$

a value practically as high as  $\bar{M}_w$  (360 kDa) was obtained considering the weight fractions ( $w_i$ ) and related molecular masses shown in Fig. S2 and listed in Table S2.

1. Tanford C, Physical chemistry of macromolecules. New York: John Wiley & Sons, Inc; 1961. pp. 145-50.
